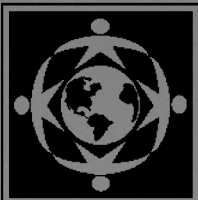

Institute on  
Psychiatric  
Services

American Psychiatric Association

# 65<sup>TH</sup> IPS

PHILADELPHIA

OCTOBER 10 – 13, 2013

APA's Leading Educational Conference on Public, Community, and Clinical Psychiatry

## Transforming Psychiatric Practice, Reforming Health Care Delivery

### Preliminary Program

#### Who Should Attend?

- ▶ All APA Members, including Early Career Psychiatrists and Psychiatric Residents
- ▶ International Psychiatrists
- ▶ Primary Care Physicians
- ▶ Mental Health Professionals from all disciplines

#### Why You Should Attend

- ▶ Earn CME credit from over 100 expertly-led education sessions.
- ▶ Network with 1,500 mental health professionals and obtain solutions for the challenges you face.
- ▶ Interact with experts in small-group settings.
- ▶ Acquire new skills in clinical psychiatry to improve patient care.
- ▶ Assess a variety of treatment choices, including psychotherapeutic and pharmacological options.

[www.psychiatry.org/IPS](http://www.psychiatry.org/IPS)

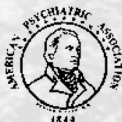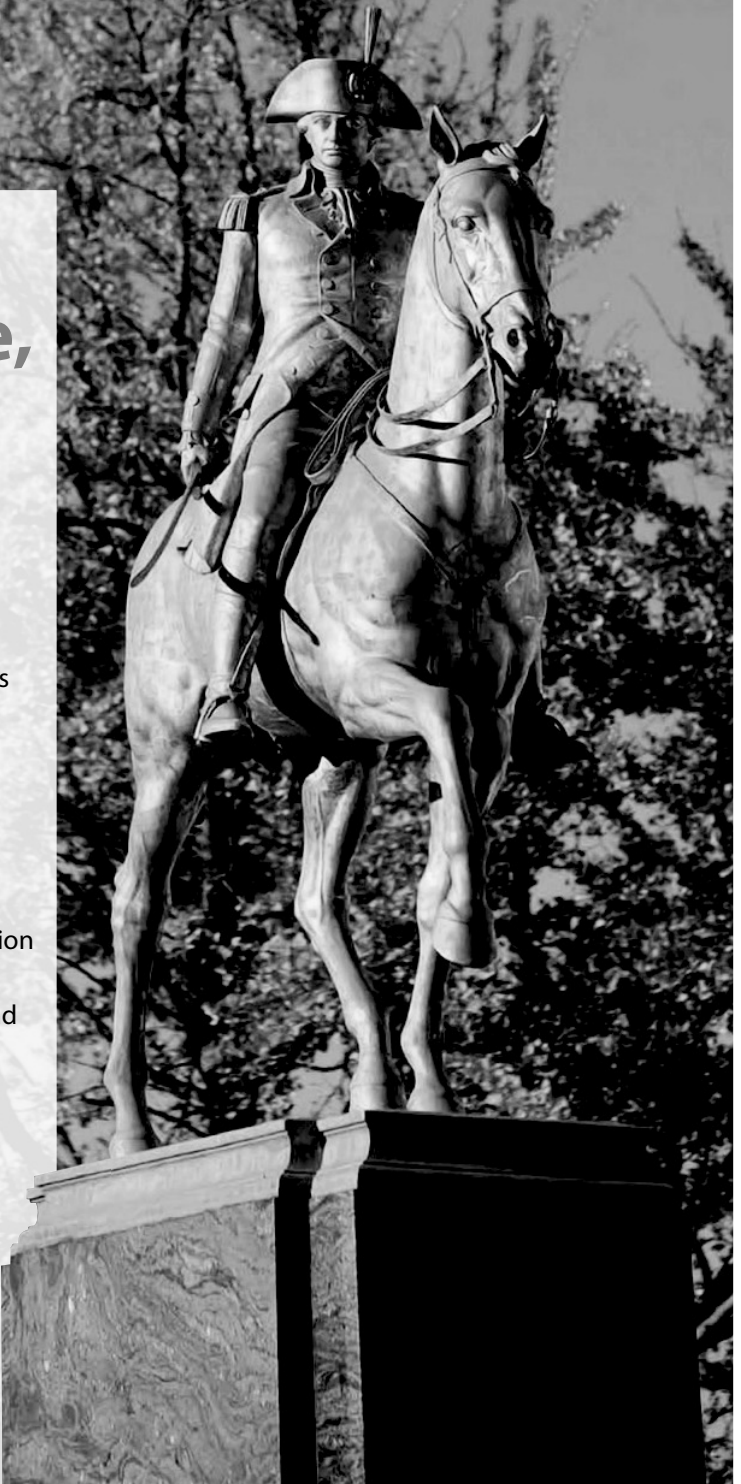

Source: https://focus.psychiatryonline.org/doi/suppl/10.1176/foc.2014.12.issue-1/suppl_file/back.pdf
