# FOCUS

THE JOURNAL OF LIFELONG LEARNING IN PSYCHIATRY



## *Disorders of Sleep: New Biologies and New Therapies*

*Guest Editor: Karl Doghramji, M.D.*

### IN CLINICAL SYNTHESIS:

Recent Advances in the Understanding of Insomnia

*Karl Doghramji, M.D.*

Parasomnias: A Review for Psychiatrists

*Thomas D. Hurwitz, M.D.*

*Michael Howell, M.D.*

*Inran S. Khawaja, M.B.B.S.*

Novel Developments in the Pharmacological  
Management of Insomnia

*David N. Neubauer, M.D.*

Circadian Rhythms in Health and Disease

*John S. Kboury, M.D.*

*Karl Doghramji, M.D.*

Psychological and Behavioral Treatments for Insomnia

*Brenda Byrne, Ph.D.*

AND INFLUENTIAL PUBLICATIONS...
