# Integrated Care Systems

*Psychiatric News* features highly informative content on the emerging practice model of integrated care.

Learn about:

- Predominant models of integrated care and the role psychiatrists play
- Working in integrated care settings
- Payment and delivery models
- APA resources on integrated care and delivery systems initiatives

For new psychiatrists entering the field, understanding the key role of systems of care has never been more important. Research published each month in *Psychiatric Services* will help residents play a vital role in the systems of care where they work, which is why the American Psychiatric Association provides psychiatric residents who are APA Members-in-Training full-text online access to *Psychiatric Services* content as a benefit.

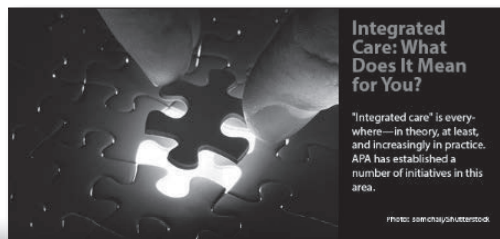

The screenshot shows the website interface for Psychiatric News. At the top, there's a navigation bar with links like 'psychiatryonline', 'DSM Library', 'Books', 'Journals', 'Topics', 'APA Guidelines', 'CME & Self-Assessment', 'News', 'For Patients', 'My POL', and a search bar. Below that is the main header with 'PSYCHIATRIC NEWS' and 'From The American Psychiatric Association'. The article title 'Integrated Care: What Does It Mean for You?' is prominently displayed, along with the date 'September 20, 2013' and DOI '10.1176/appi.pn.2013.1C\_1'. There are social media sharing options (Print, E-mail, Share, Reprints) and a quote: 'Integrated care "is everywhere—in theory, at least, and increasingly in practice. The concept is a feature of the delivery-system improvements in the new health care reform law, and policymakers and many clinicians have converged on the idea that general medical and behavioral health services should be brought together in a patient-centered manner. Today, a small but dedicated and growing cadre of psychiatrists is advancing the cause of integrated care and the participation of psychiatrists in collaborative-care models.' The article text continues, mentioning the APA's initiatives and the work of the Council on Healthcare Systems and Financing, chaired by Lori Raney, M.D., and the Board of Trustees Health Care Reform Strategic Action Work Group, chaired by Howard Goldman, M.D.

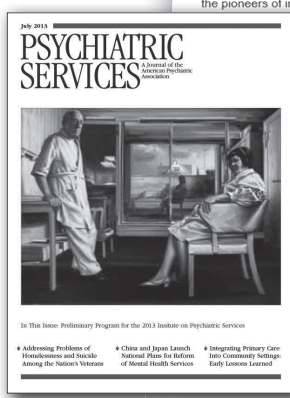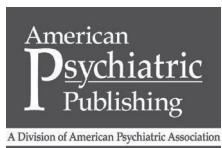

psychnews.psychiatryonline.org  
 www.appi.org • 1-800-368-5777 • Email: appi@psych.org

Priority Code AH1329
